# Supplementary material
Source: Springer Nature journal article supplement (https://www.springermedizin.de/resource/supplementary/12981_2007_70_MOESM4_ESM.pdf/9603792)

**Figure 4.** Change of lipid profile after TI in NNRTI and PI group.

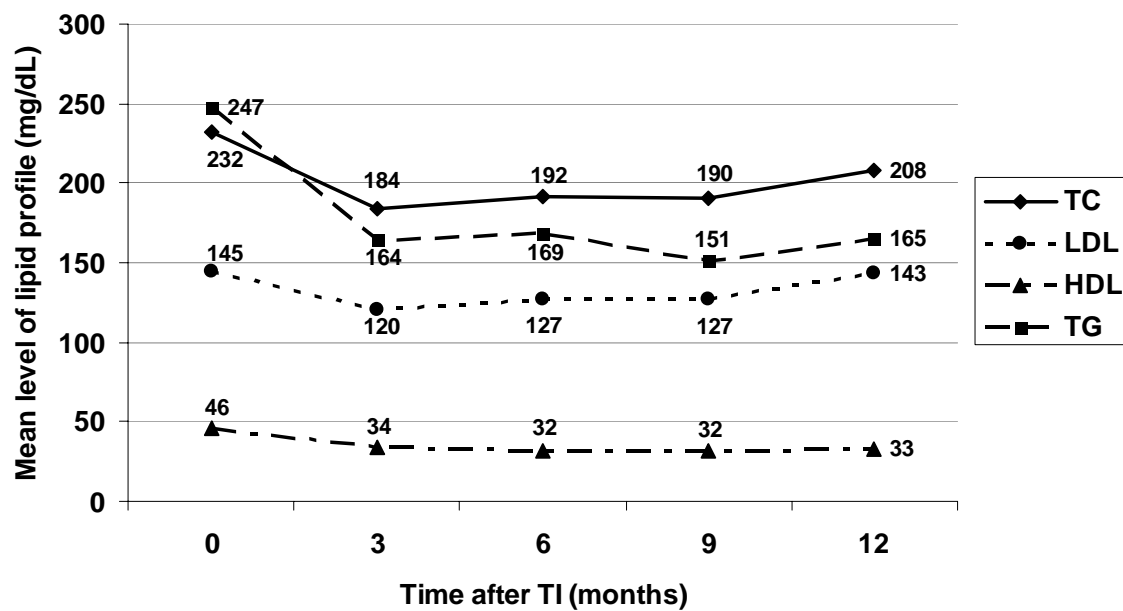

Supplement: MOESM4 [file 9603792]
